# Supplementary material
Source: publisher site journal article supplement (https://www.dovepress.com/article/414862)
Supplement: Supplementary file 1 [file get_supplementary_file.php]

## SUPPLEMENTARY MATERIALS

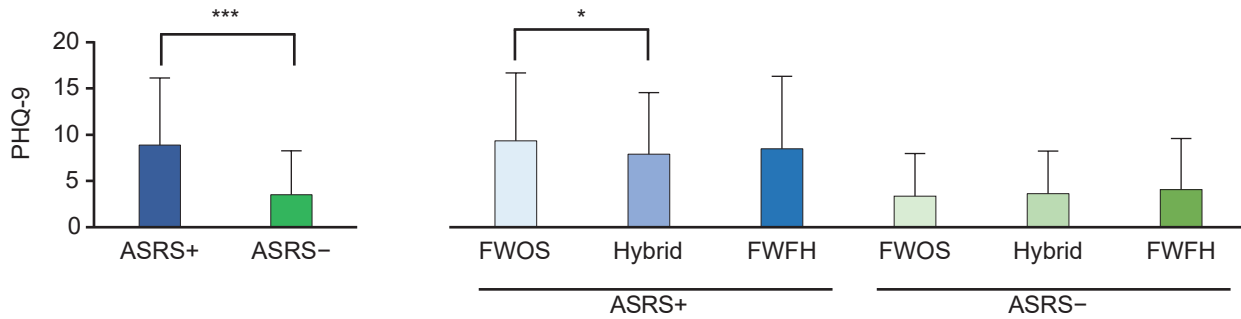

**Supplementary Figure 1. Depressive symptoms (PHQ-9 scores) stratified by working conditions in workers with (ASRS+) and without (ASRS-) ADHD symptoms.**

\* $p < 0.05$ , \*\*\* $p < 0.001$

**Abbreviations:** ASRS, Adult ADHD Self-Report Scale; FWFH, full working from home; FWOS, full working on site; PHQ-9, Patient Health Questionnaire.

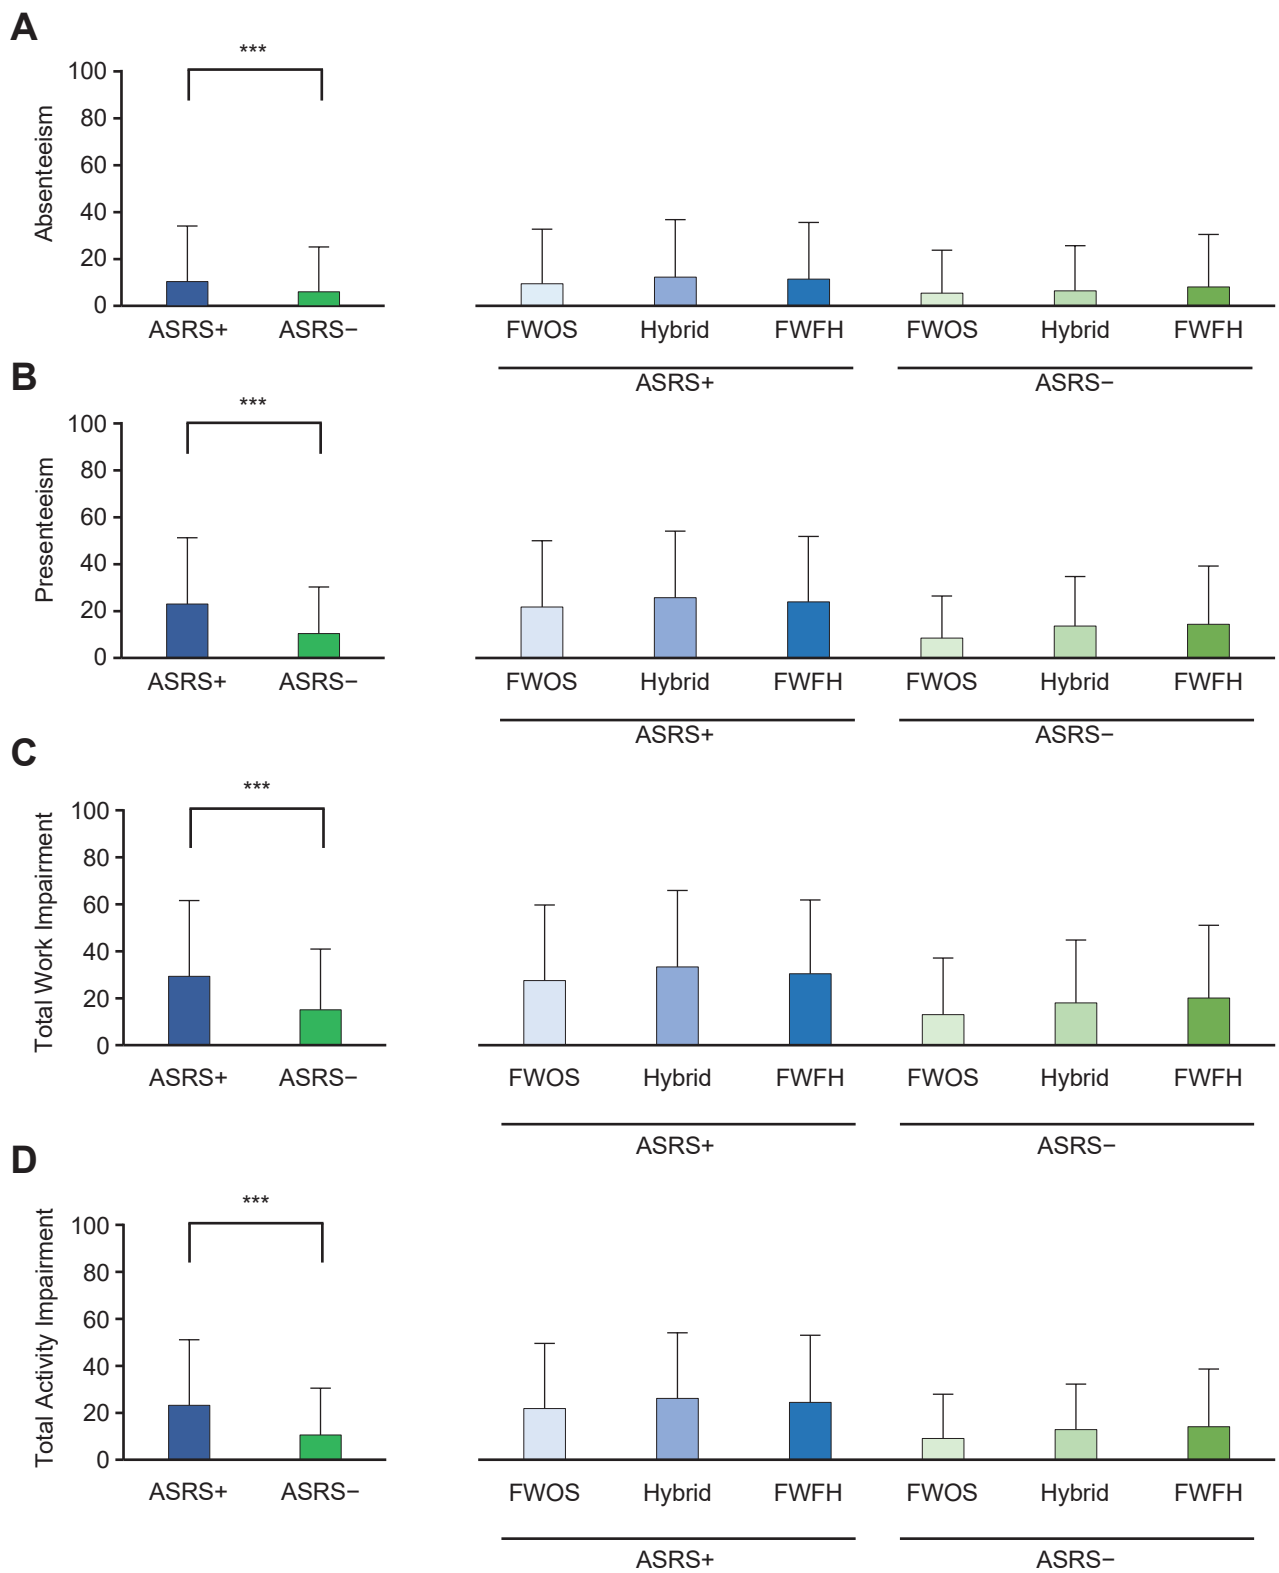

**Supplementary Figure 2A–D. Work productivity (WPAI scores) stratified by working conditions in workers with (ASRS+) and without (ASRS–) ADHD symptoms.**

A: Absenteeism, B: Presenteeism, C: Total work impairment, D: Total activity impairment

\*\*\* $p < 0.001$

**Abbreviations:** ASRS, Adult ADHD Self-Report Scale; FWFH, full working from home; FWOS, full working on site; WPAI, Work Productivity and Activity Impairment.

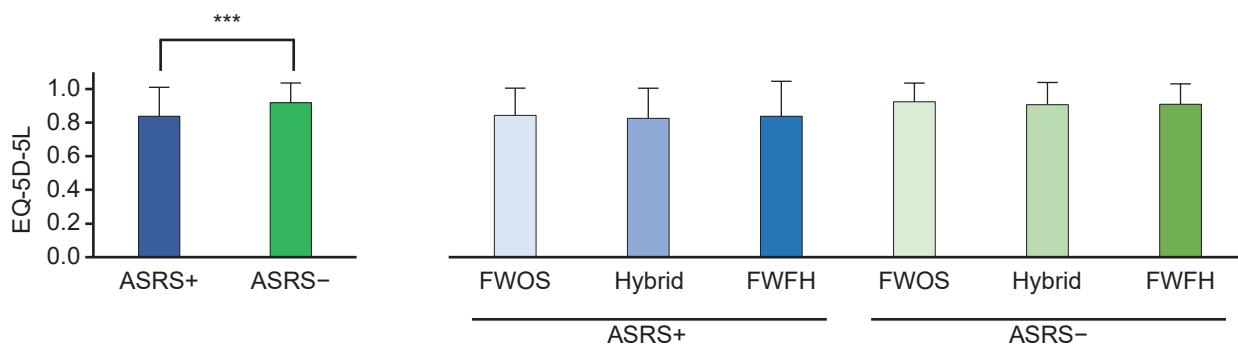

**Supplementary Figure 3. QOL (EQ-5D-5L scores) stratified by working conditions in workers with (ASRS+) and without (ASRS-) ADHD symptoms.**

\*\*\* $p < 0.001$

**Abbreviations:** ASRS, Adult ADHD Self-Report Scale; EQ-5D-5L, EuroQol 5-Dimensions 5-Levels; FWFH, full working from home; FWOS, full working on site.

**Supplementary Table 1. Poisson regression analysis for depressive symptoms (PHQ-9 score) in workers without ADHD symptoms**

|                                  | Estimate | SE    | t value | P-value |
|----------------------------------|----------|-------|---------|---------|
| Intercept                        | 1.697    | 0.111 | 15.276  | <0.001  |
| Hybrid work                      | 0.125    | 0.048 | 2.598   | 0.009   |
| FWFH                             | 0.279    | 0.052 | 5.339   | <0.001  |
| ASRS (Part A) score              | 0.218    | 0.015 | 14.624  | <0.001  |
| Age                              | -0.013   | 0.002 | -6.592  | <0.001  |
| Never been married               | 0.153    | 0.040 | 3.785   | <0.001  |
| Annual income (1–4 million JPY)  | -0.113   | 0.074 | -1.517  | 0.129   |
| Annual income (4–10 million JPY) | -0.318   | 0.079 | -4.030  | <0.001  |
| Annual income (≥10 million JPY)  | -0.621   | 0.116 | -5.362  | <0.001  |
| Annual income (unknown)          | -0.161   | 0.081 | -1.978  | 0.048   |
| Regular work                     | 0.100    | 0.049 | 2.025   | 0.043   |
| Discretionary work               | -0.192   | 0.040 | -4.828  | <0.001  |
| Reduced working hours            | 0.306    | 0.056 | 5.516   | <0.001  |
| Business/Marketing               | -0.120   | 0.061 | -1.973  | 0.049   |
| Technical                        | -0.170   | 0.055 | -3.099  | 0.002   |

**Abbreviations:** ADHD, attention-deficit/hyperactivity disorder; ASRS, Adult ADHD Self-Report Scale; FWFH, full working from home; JPY, Japanese yen; PHQ-9, Patient Health Questionnaire; SE, standard error.

**Supplementary Table 2A–D. Multiple regression analysis for work productivity (WPAI scores) in workers without ADHD symptoms**

A. Absenteeism

|                                 | <b>Estimate</b> | <b>SE</b> | <b>t value</b> | <b>P-value</b> |
|---------------------------------|-----------------|-----------|----------------|----------------|
| Intercept                       | 11.470          | 4.381     | 2.618          | 0.009          |
| Hybrid work                     | 0.792           | 1.663     | 0.476          | 0.634          |
| FWFH                            | 3.113           | 1.884     | 1.652          | 0.099          |
| ASRS (Part A) score             | 0.392           | 0.544     | 0.721          | 0.471          |
| Never been married              | -1.916          | 1.314     | -1.458         | 0.145          |
| Annual income (≥10 million JPY) | -5.114          | 2.472     | -2.068         | 0.039          |
| Regular work                    | 3.327           | 1.669     | 1.993          | 0.047          |
| Number of working days per week | -1.899          | 0.886     | -2.143         | 0.032          |
| Reduced working hours           | 6.031           | 2.311     | 2.610          | 0.009          |
| Manufacture/Construction        | 4.754           | 2.117     | 2.245          | 0.025          |
| Specialist                      | 6.074           | 2.875     | 2.113          | 0.035          |
| Adjusted R-squared              | 0.026           |           |                |                |

B. Presenteeism

|                          | <b>Estimate</b> | <b>SE</b> | <b>t value</b> | <b>P-value</b> |
|--------------------------|-----------------|-----------|----------------|----------------|
| Intercept                | 4.653           | 1.135     | 4.099          | <0.001         |
| Hybrid work              | 4.145           | 1.686     | 2.459          | 0.014          |
| FWFH                     | 6.751           | 1.930     | 3.497          | <0.001         |
| ASRS (Part A) score      | 1.611           | 0.557     | 2.890          | 0.004          |
| Reduced working hours    | 6.286           | 2.297     | 2.737          | 0.006          |
| Job change/transfer      | 3.766           | 2.476     | 1.521          | 0.129          |
| Administration           | 2.975           | 1.552     | 1.917          | 0.056          |
| Manufacture/Construction | 5.351           | 2.213     | 2.418          | 0.016          |
| Adjusted R-squared       | 0.040           |           |                |                |

### C. Total work impairment

|                                        | <b>Estimate</b> | <b>SE</b> | <b>t value</b> | <b>P-value</b> |
|----------------------------------------|-----------------|-----------|----------------|----------------|
| Intercept                              | 18.638          | 5.837     | 3.193          | 0.001          |
| Hybrid work                            | 5.016           | 2.206     | 2.274          | 0.023          |
| FWFH                                   | 8.068           | 2.507     | 3.218          | 0.001          |
| ASRS (Part A) score                    | 2.099           | 0.728     | 2.884          | 0.004          |
| Annual income ( $\geq 10$ million JPY) | -6.715          | 3.269     | -2.054         | 0.040          |
| Number of working days per week        | -1.840          | 1.156     | -1.591         | 0.112          |
| Reduced working hours                  | 8.742           | 3.083     | 2.836          | 0.005          |
| Manufacture/Construction               | 6.944           | 2.827     | 2.456          | 0.014          |
| Adjusted R-squared                     | 0.042           |           |                |                |

### D. Total activity impairment

|                            | <b>Estimate</b> | <b>SE</b> | <b>t value</b> | <b>P-value</b> |
|----------------------------|-----------------|-----------|----------------|----------------|
| Intercept                  | 5.597           | 1.138     | 4.919          | <0.001         |
| Hybrid work                | 2.923           | 1.687     | 1.733          | 0.083          |
| FWFH                       | 5.778           | 1.946     | 2.969          | 0.003          |
| ASRS (Part A) score        | 1.423           | 0.562     | 2.532          | 0.012          |
| Reduced working hours      | 7.054           | 2.310     | 3.054          | 0.002          |
| Administration             | 3.751           | 1.561     | 2.402          | 0.017          |
| Manufacturing/Construction | 3.817           | 2.231     | 1.711          | 0.087          |
| Adjusted R-squared         | 0.030           |           |                |                |

**Abbreviations:** ADHD, attention-deficit/hyperactivity disorder; ASRS, Adult ADHD Self-Report Scale; FWFH, full working from home; JPY, Japanese yen; SE, standard error, WPAI, Work Productivity and Activity Impairment.

**Supplementary Table 3. Multiple regression analysis for QOL (EQ-5D-5L score) in workers without ADHD symptoms**

|                                               | Estimate | SE    | t value | P-value |
|-----------------------------------------------|----------|-------|---------|---------|
| Intercept                                     | 0.922    | 0.009 | 98.820  | <0.001  |
| Hybrid work                                   | -0.021   | 0.010 | -1.995  | 0.046   |
| FWFH                                          | -0.019   | 0.012 | -1.625  | 0.104   |
| ASRS (Part A) score                           | -0.006   | 0.003 | -1.897  | 0.058   |
| Never been married                            | -0.014   | 0.008 | -1.764  | 0.078   |
| Highest education level (University graduate) | 0.013    | 0.008 | 1.582   | 0.114   |
| Annual income ( $\geq 10$ million JPY)        | 0.026    | 0.015 | 1.686   | 0.092   |
| Discretionary work                            | 0.017    | 0.009 | 1.897   | 0.058   |
| Reduced working hours                         | -0.040   | 0.014 | -2.914  | 0.004   |
| Job change/transfer                           | -0.033   | 0.015 | -2.273  | 0.023   |
| Business/Marketing                            | 0.017    | 0.012 | 1.443   | 0.149   |
| Adjusted R-squared                            | 0.041    |       |         |         |

**Abbreviations:** ADHD, attention-deficit/hyperactivity disorder; ASRS, Adult ADHD Self-Report Scale; EQ-5D-5L, EuroQol 5-Dimensions 5-Levels; FWFH, full working from home; JPY, Japanese yen; SE, standard error.
